# Supplementary material for: Microfluidic 2-D PAGE using multifunctional in situ polyacrylamide gels and discontinuous buffers
Source: Royal Society of Chemistry journal article supplement (doi:10.1039/b805541f), 2008-11-19
Supplement: b805541f.pdf [file b805541f.pdf]

**Supplementary Material**

Measurements of SDS-PAGE separations were performed using both the continuous and discontinuous buffer systems. In both cases, tests were performed in a single chip containing 5 SDS-PAGE channels. Four model proteins were employed, namely parvalbumin (MW 12 kDa), trypsin inhibitor (MW 21 kDa), ovalbumin (MW 45 kDa), and bovine serum albumin (BSA) (MW 66 kDa). Protein was loaded at a concentration of 25 µg/mL, with an estimated 0.53 ng total protein loaded into each SDS-PAGE channel. A constant current of 5 µA was applied during SDS-PAGE separations.

Measurement data for the continuous and discontinuous buffer systems is provided below in section I and section II, respectively. Using this data, the peak capacities for the SDS-PAGE separations may be estimated. Defining the separation time (T) as the total time between the first and last peaks of each electropherogram, and defining the time domain band widths (BW) as the time required for the half-height full-width of each band's intensity profile to pass the detector, the overall peak capacity is estimated from the average T/BW ratio across all five proteins, i.e.

$$\text{peak capacity} = \frac{1}{n} \sum_{i=1}^n \frac{T}{BW_i}$$

where  $n = 5$  and  $BW_i$  is the width of the  $i^{\text{th}}$  protein band.

Table S-1. Summary of estimated peak capacities for each buffer system, and relative standard deviations in measured elution times and peak intensities for between proteins in each case.

|                                  | Continuous buffer | Discontinuous buffer |
|----------------------------------|-------------------|----------------------|
| Peak capacity                    | 27                | 144                  |
| Average RSD% of elution times    | 2.8%              | 7.8%                 |
| Average RSD% of peak intensities | 26.5%             | 28.8%                |

**I. Continuous buffer SDS-PAGE data**

Table S-A1. Elution times (sec)

|                   | $t_1$ | $t_2$ | $t_3$ | $t_4$ | $t_5$ | Avg | RSD% |
|-------------------|-------|-------|-------|-------|-------|-----|------|
| Parvalbumin       | 277   | 274   | 276   | 274   | 280   | 276 | 0.9% |
| Trypsin Inhibitor | 323   | 323   | 321   | 325   | 329   | 324 | 0.9% |
| Ovalbumin         | 390   | 339   | 382   | 391   | 400   | 380 | 6.8% |
| BSA               | 434   | 415   | 405   | 420   | 424   | 420 | 2.6% |

Table S-A2. Peak intensities (arbitrary units)

|                   | $I_1$ | $I_2$ | $I_3$ | $I_4$ | $I_5$ | Avg  | RSD%  |
|-------------------|-------|-------|-------|-------|-------|------|-------|
| Parvalbumin       | 813   | 841   | 1126  | 1104  | 870   | 951  | 15.9% |
| Trypsin Inhibitor | 13075 | 4005  | 10135 | 3454  | 5687  | 7271 | 57.4% |
| Ovalbumin         | 7536  | 9120  | 11548 | 9277  | 5794  | 8655 | 24.8% |
| BSA               | 802   | 990   | 868   | 866   | 926   | 890  | 8.0%  |

Table S-A3. Full width, half-maximum bandwidths (sec)

|                   | $t_{FWHM,1}$ | $t_{FWHM,2}$ | $t_{FWHM,3}$ | $t_{FWHM,4}$ | $t_{FWHM,5}$ | Avg   | RSD% |
|-------------------|--------------|--------------|--------------|--------------|--------------|-------|------|
| Parvalbumin       | 26.75        | 19.00        | 22.00        | 18.00        | 16.00        | 20.35 | 21   |
| Trypsin Inhibitor | 3.50         | 3.50         | 3.50         | 4.75         | 6.50         | 4.35  | 30   |
| Ovalbumin         | 3.50         | 4.00         | 3.25         | 3.00         | 5.75         | 3.9   | 28   |
| BSA               | 6.25         | 6.50         | 6.75         | 4.50         | 4.25         | 5.65  | 21   |

**II. Discontinuous buffer SDS-PAGE data**

Table S-B1. Elution times (sec)

|                   | $t_1$ | $t_2$ | $t_3$ | $t_4$ | $t_5$ | Avg | RSD%  |
|-------------------|-------|-------|-------|-------|-------|-----|-------|
| Parvalbumin       | 276   | 242   | 211   | 221   | 210   | 232 | 11.1% |
| Trypsin Inhibitor | 457   | 412   | 372   | 389   | 387   | 403 | 7.7%  |
| Ovalbumin         | 493   | 455   | 433   | 460   | 466   | 461 | 4.7%  |
| BSA               | 563   | 529   | 496   | 485   | 485   | 512 | 6.4%  |

Table S-B2. Peak intensities (arbitrary units)

|                   | $I_1$ | $I_2$ | $I_3$ | $I_4$ | $I_5$ | Avg  | RSD%  |
|-------------------|-------|-------|-------|-------|-------|------|-------|
| Parvalbumin       | 515   | 544   | 553   | 587   | 583   | 556  | 5.3%  |
| Trypsin Inhibitor | 7160  | 4793  | 2268  | 4717  | 3254  | 4438 | 41.7% |
| Ovalbumin         | 6387  | 8558  | 4651  | 2080  | 3111  | 4957 | 52.2% |
| BSA               | 636   | 694   | 860   | 909   | 911   | 802  | 16.0% |

Table S-B3. Full width, half-maximum bandwidths (sec)

|                   | $t_{FWHM,1}$ | $t_{FWHM,2}$ | $t_{FWHM,3}$ | $t_{FWHM,4}$ | $t_{FWHM,5}$ | Avg  | RSD% |
|-------------------|--------------|--------------|--------------|--------------|--------------|------|------|
| Parvalbumin       | 5.00         | 5.00         | 3.25         | 2.50         | 4.00         | 3.95 | 28   |
| Trypsin Inhibitor | 1.00         | 1.00         | 0.75         | 1.00         | 1.00         | 0.95 | 12   |
| Ovalbumin         | 0.75         | 0.50         | 0.50         | 0.50         | 0.75         | 0.60 | 23   |
| BSA               | 1.25         | 1.00         | 1.00         | 1.00         | 1.00         | 1.05 | 11   |
